# Supplementary material for: Biotransformation of 4-methylcoumarins by cambial meristematic cells of Camptotheca acuminata
Source: Royal Society of Chemistry journal article supplement (doi:10.1039/c9ra00522f), 2019-01-01
Supplement: c9ra00522f1.pdf [file c9ra00522f1.pdf]

## **Supplementary Data**

### **Biotransformation of 4-methylcoumarins by cambial meristematic cells of *Camptotheca acuminata***

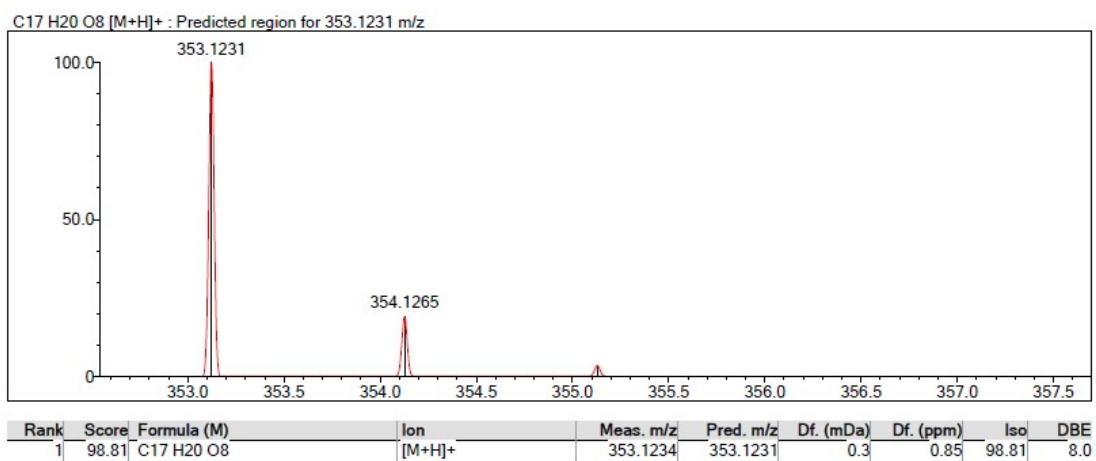

**Fig. S1.** HR-ESI-MS spectrum of **I-1** in CH<sub>3</sub>OH.

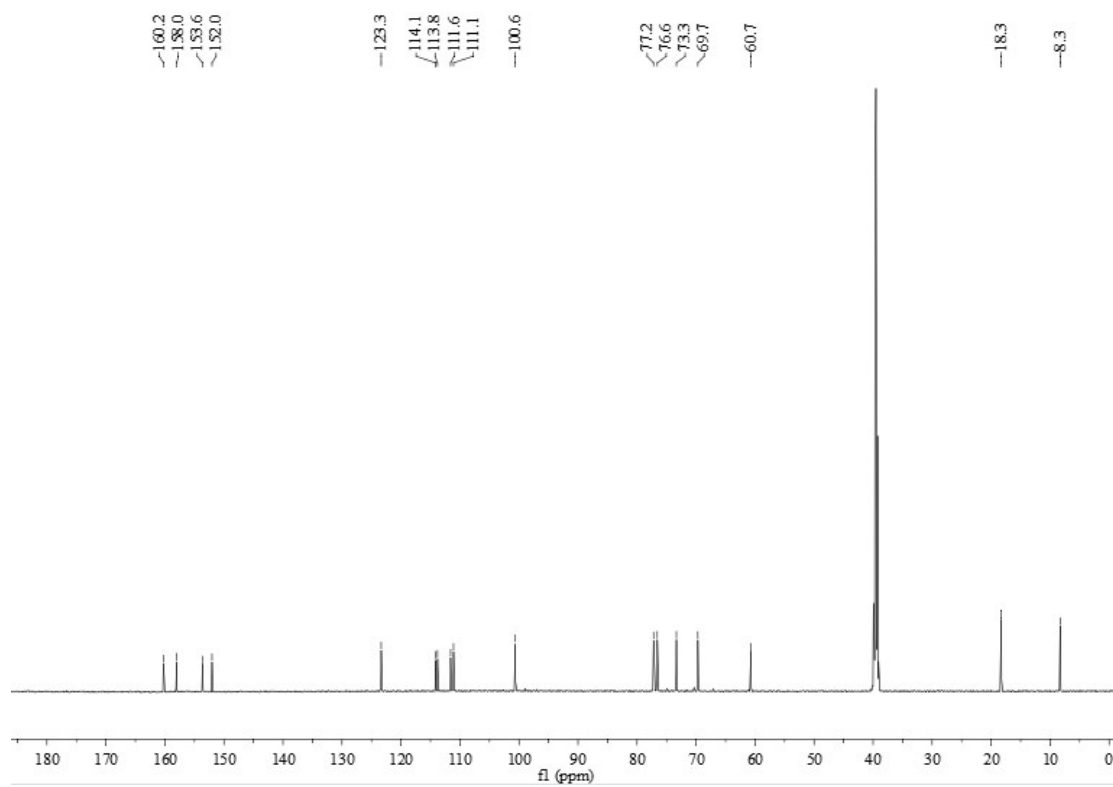

**Fig. S2.**  $^{13}\text{C}$  NMR spectrum (125 MHz) of I-1 in  $\text{DMSO-}d_6$ .

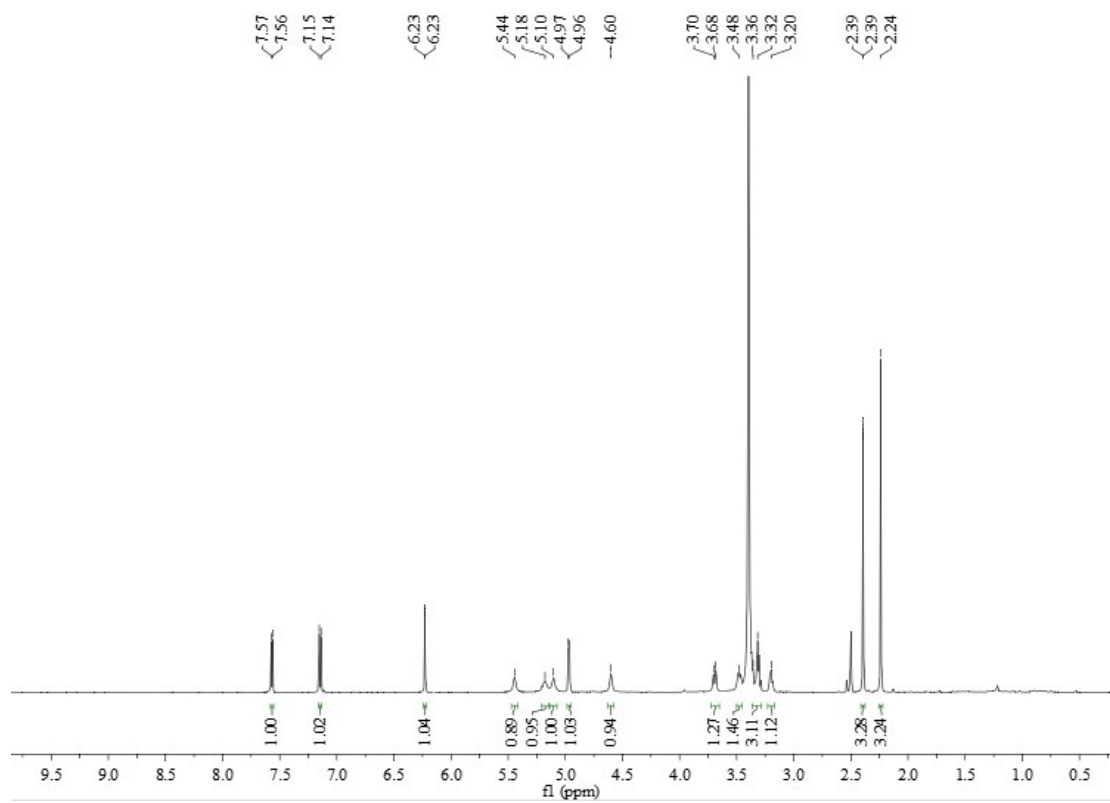

**Fig. S3.**  $^1\text{H}$  NMR spectrum (500 MHz) of **I-1** in  $\text{DMSO-}d_6$ .

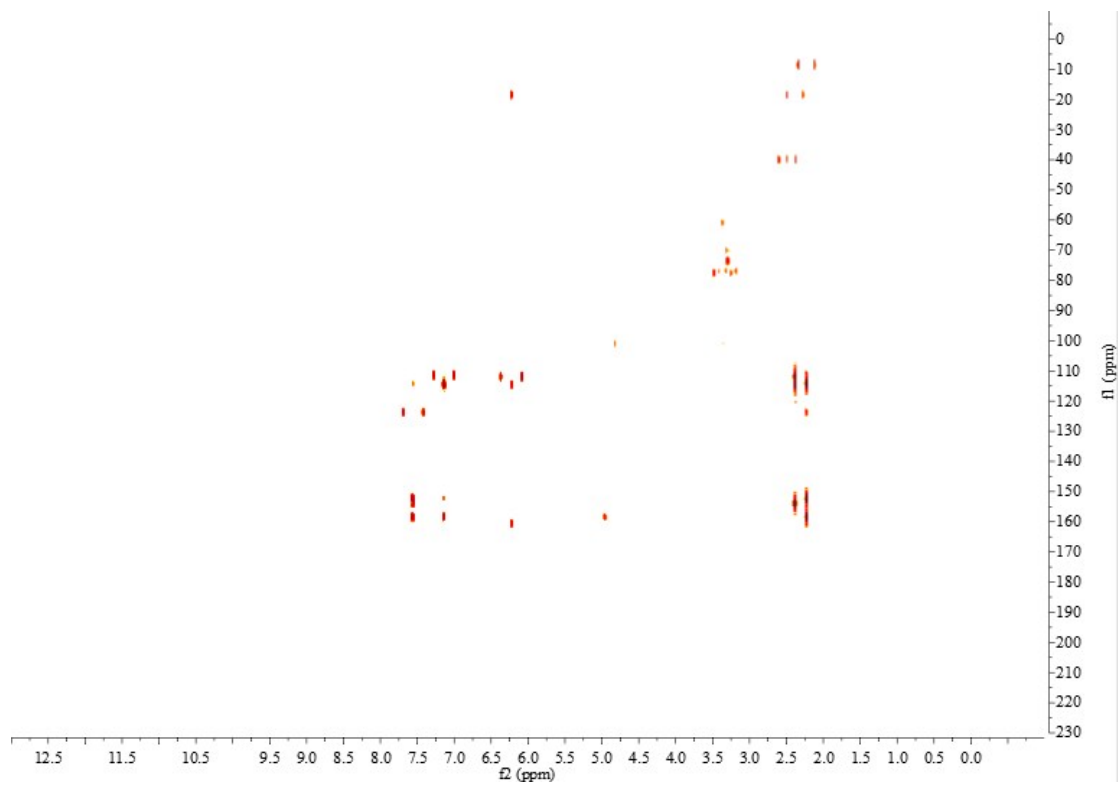

**Fig. S4.** HMBC spectrum of **I-1** in DMSO-*d*<sub>6</sub>.

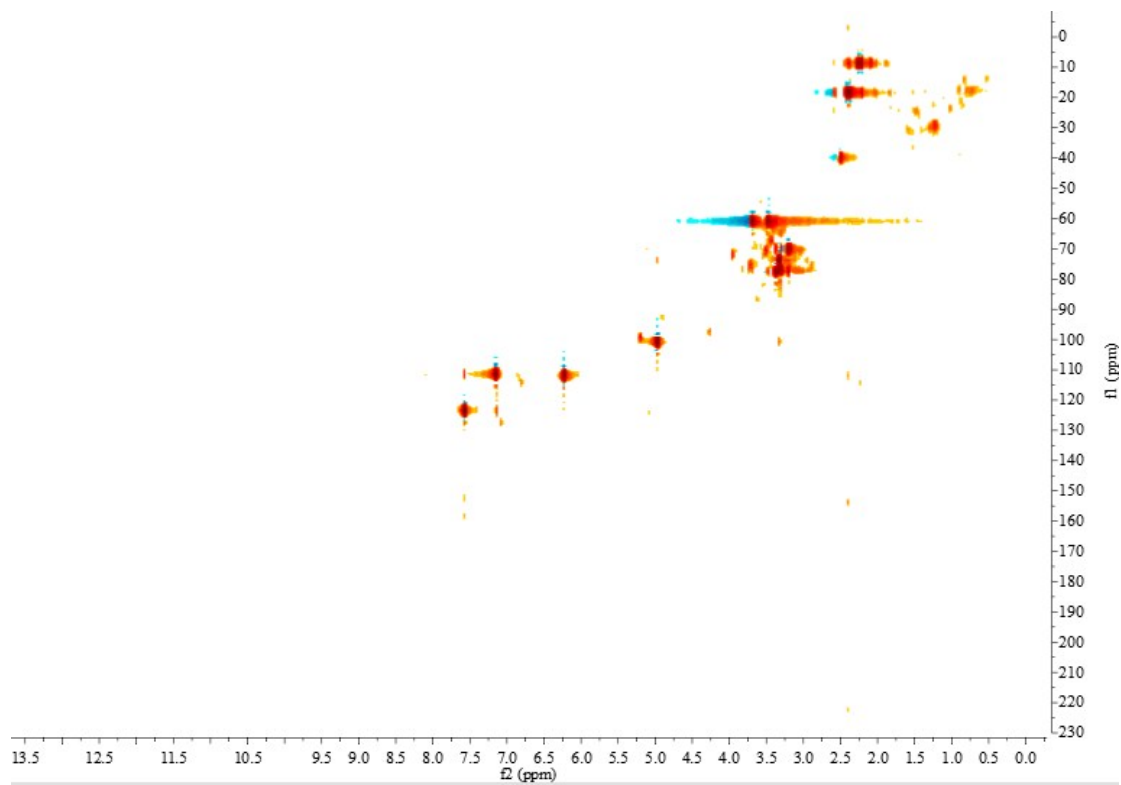

**Fig. S5.** HSQC spectrum of **I-1** in DMSO-*d*<sub>6</sub>.

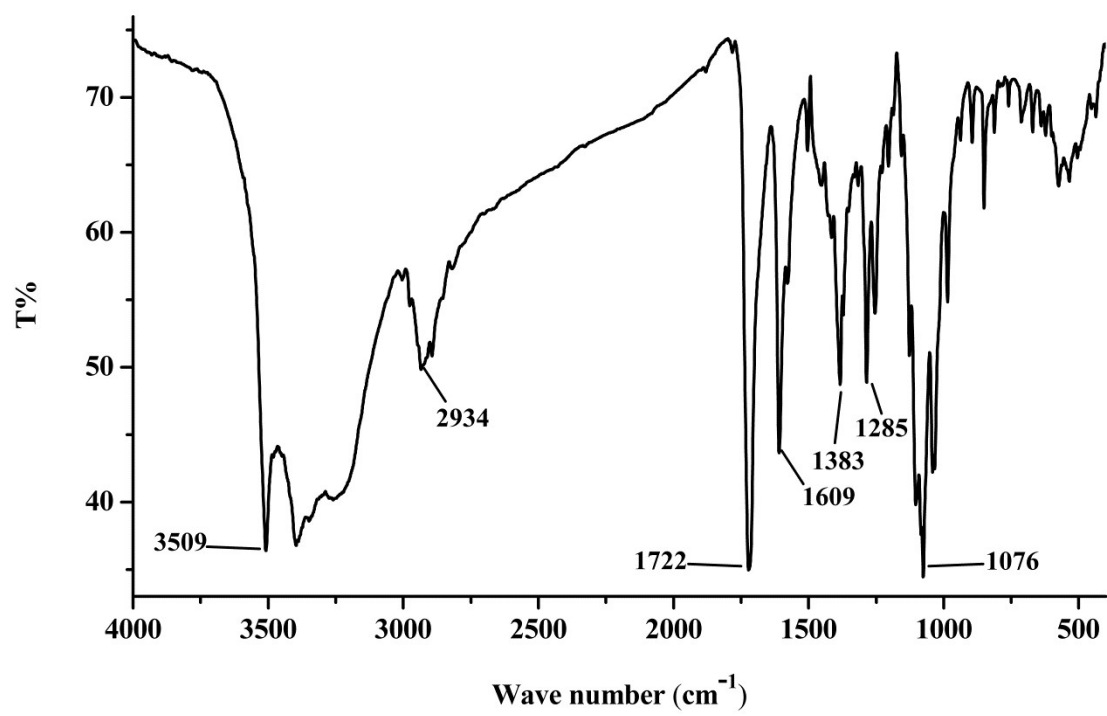

Fig. S6. IR spectrum of I-1.

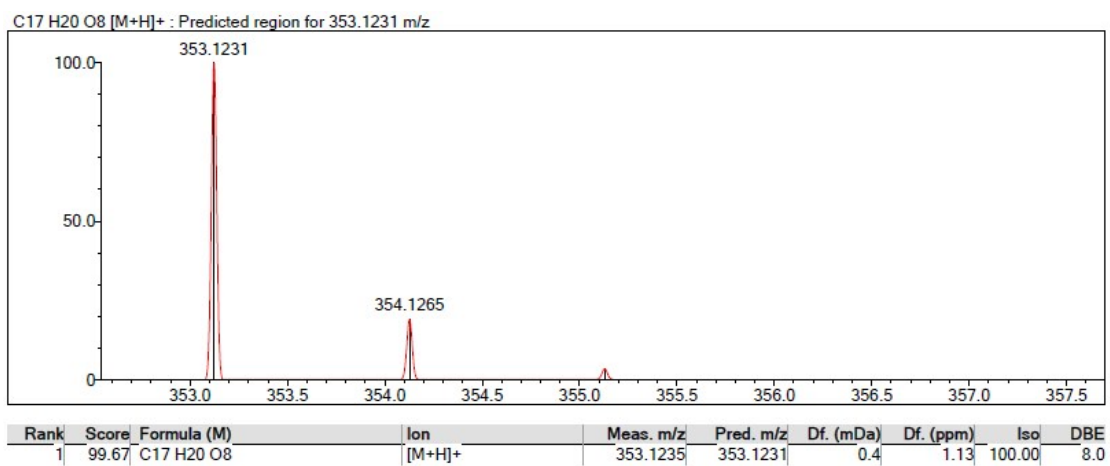

**Fig. S7.** HR-ESI-MS spectrum of **II-1** in CH<sub>3</sub>OH.



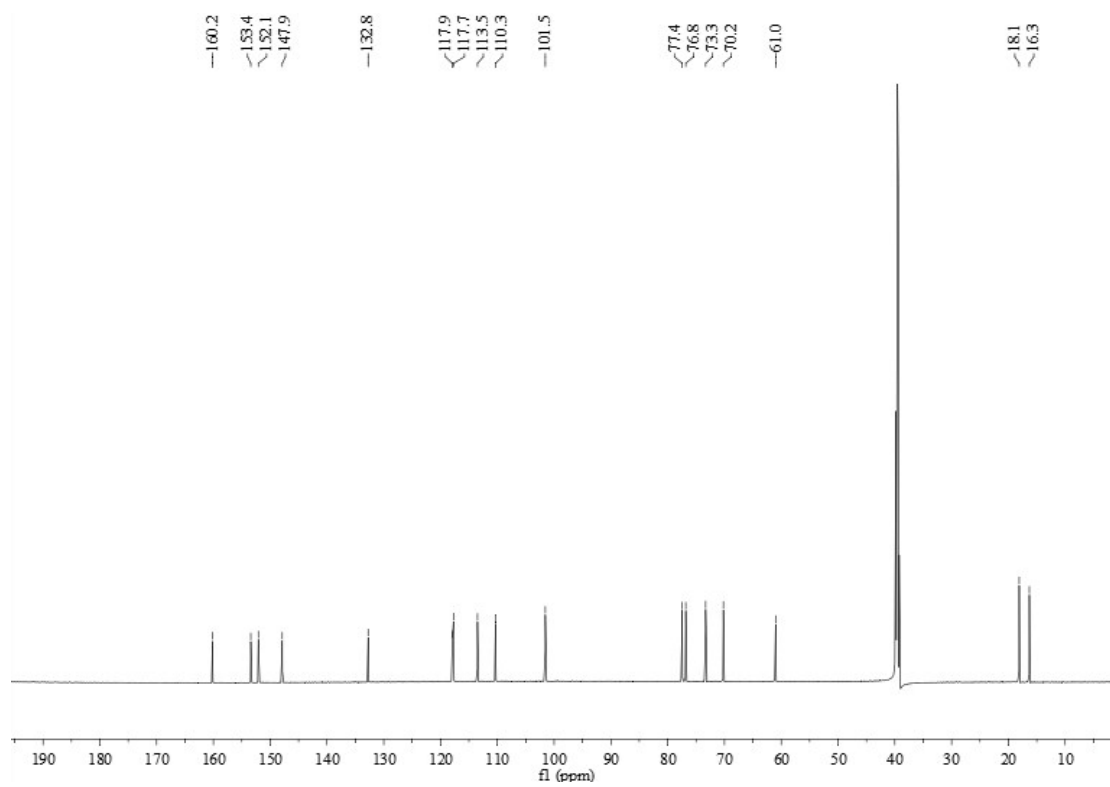

**Fig. S8.**  $^{13}\text{C}$  NMR spectrum (125 MHz) of **II-1** in  $\text{DMSO-}d_6$ .

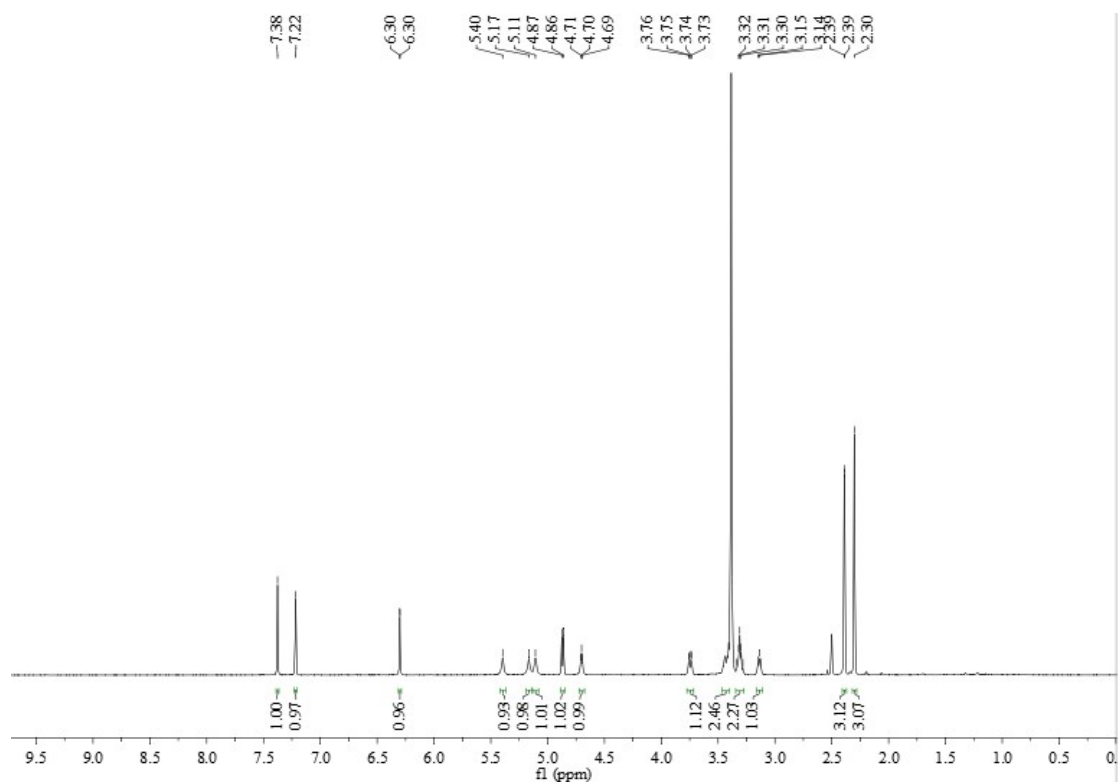

**Fig. S9.**  $^1\text{H}$  NMR spectrum (500 MHz) of **II-1** in  $\text{DMSO-}d_6$ .

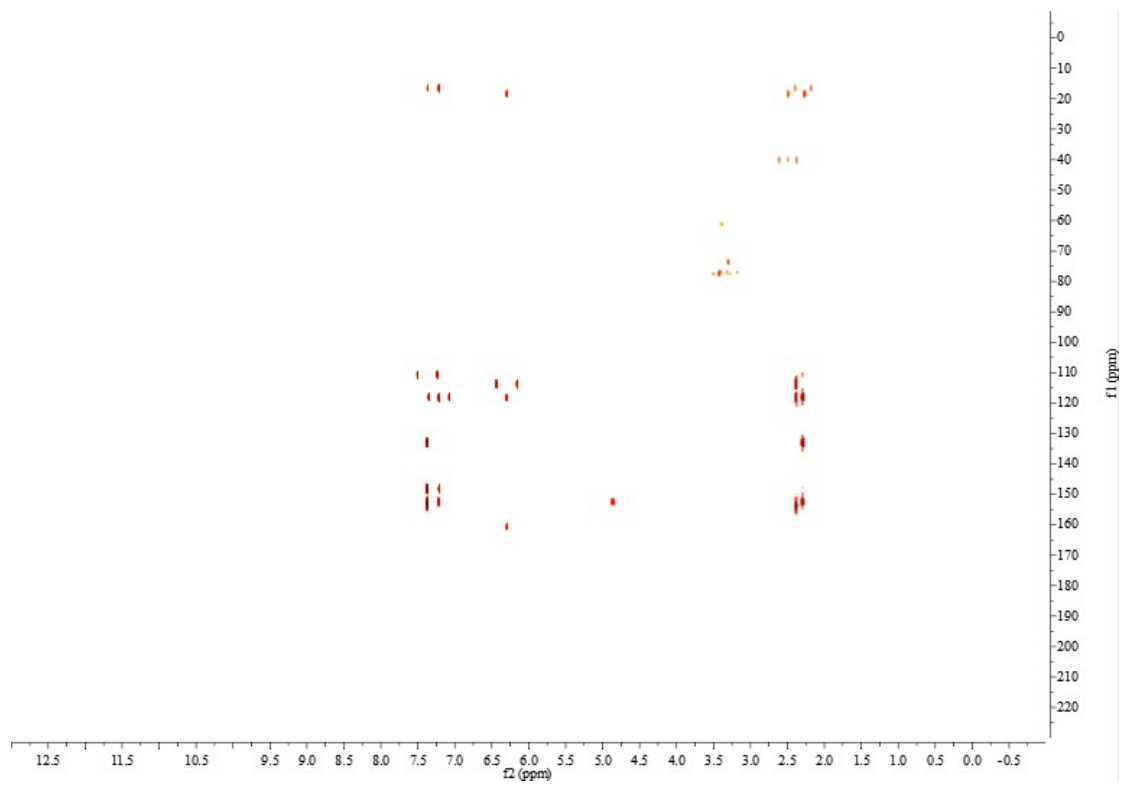

**Fig. S10.** HMBC spectrum of **II-1** in DMSO-*d*<sub>6</sub>.

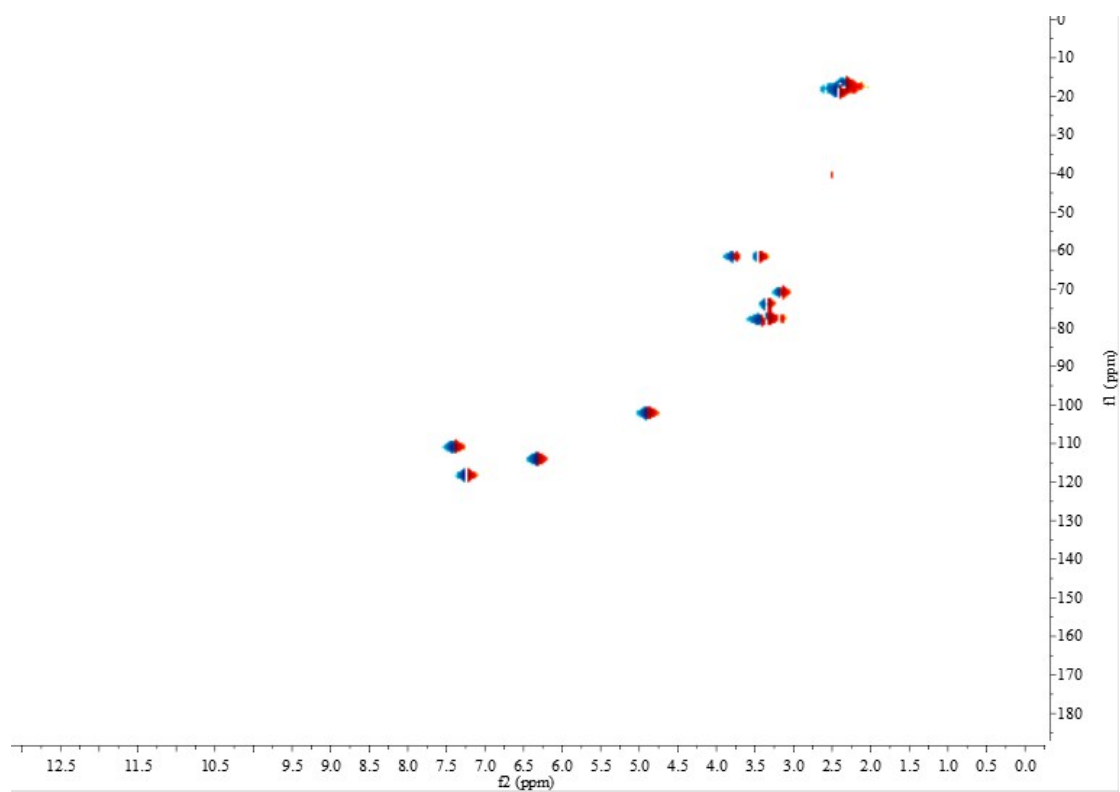

**Fig. S11.** HSQC spectrum of **II-1** in DMSO-*d*<sub>6</sub>.

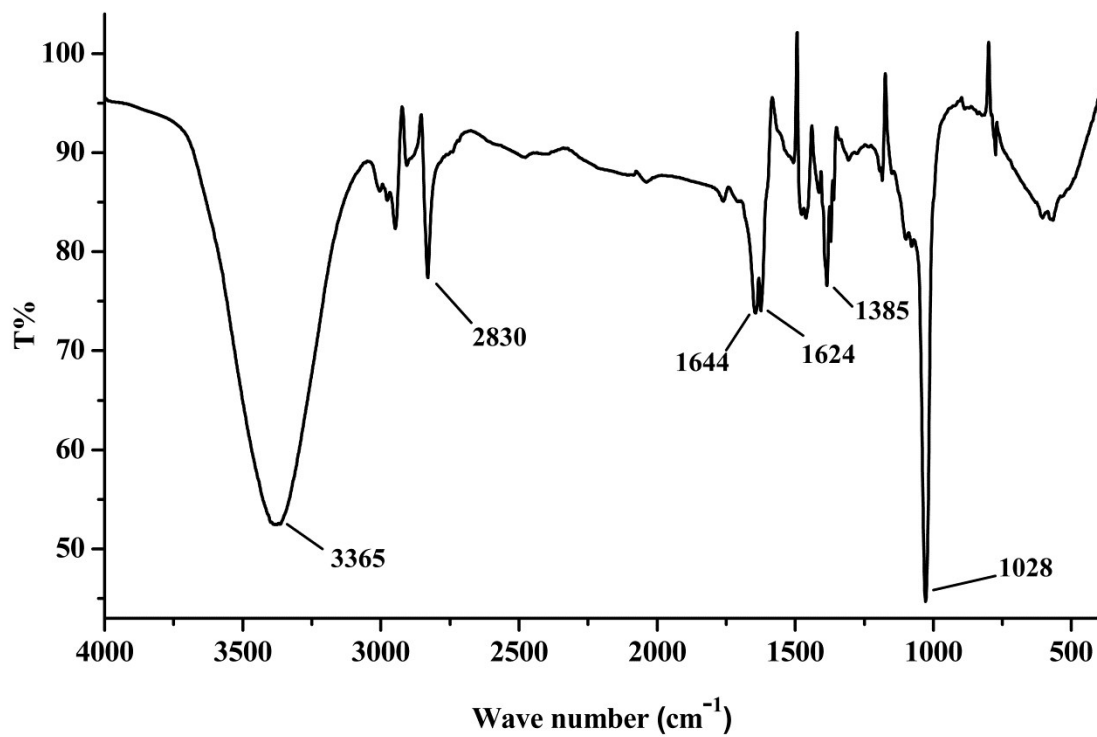

**Fig. S12.** IR spectrum of II-1.

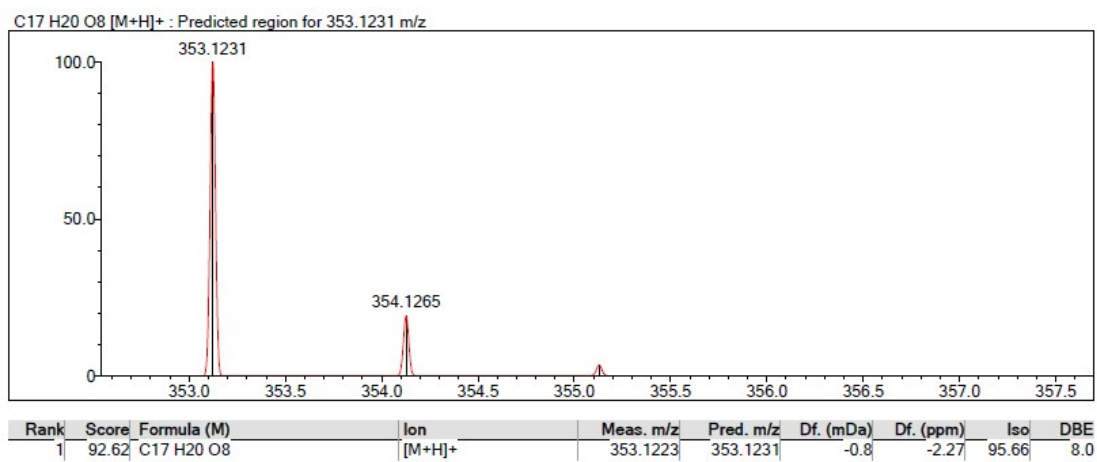

**Fig. S13.** HR-ESI-MS spectrum of **IV-1** in CH<sub>3</sub>OH.

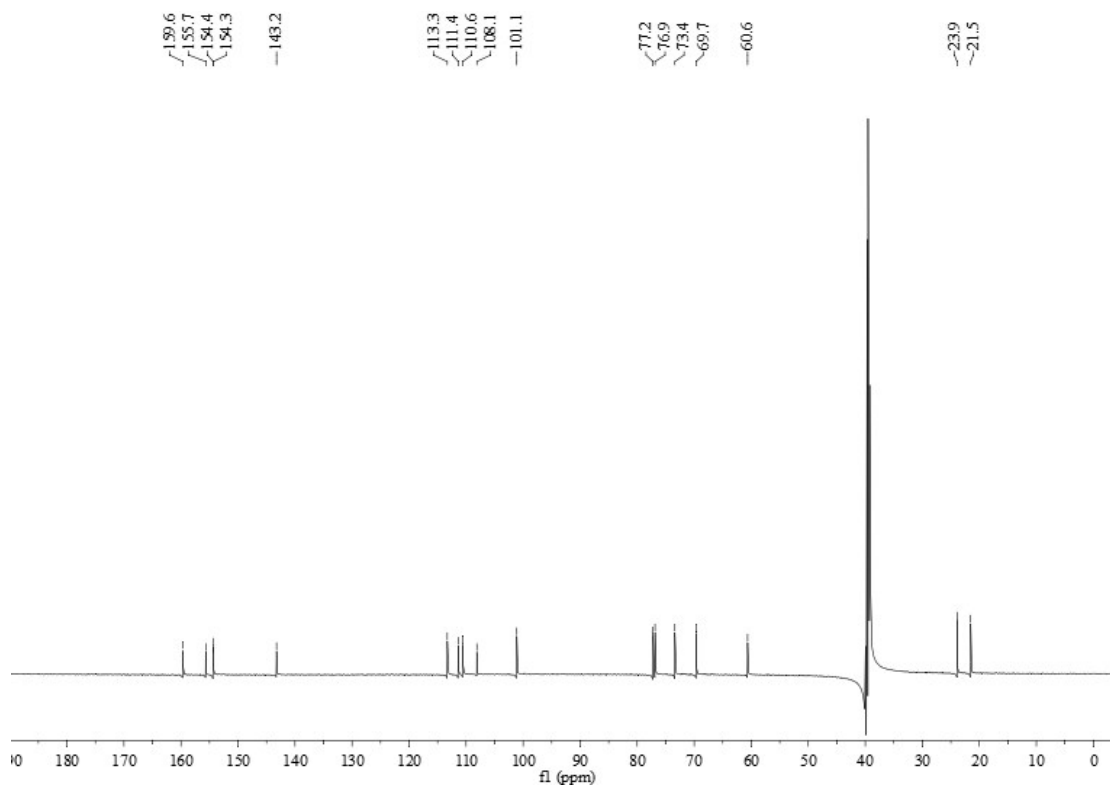

**Fig. S14.**  $^{13}\text{C}$  NMR spectrum (125 MHz) of **IV-1** in  $\text{DMSO-}d_6$ .

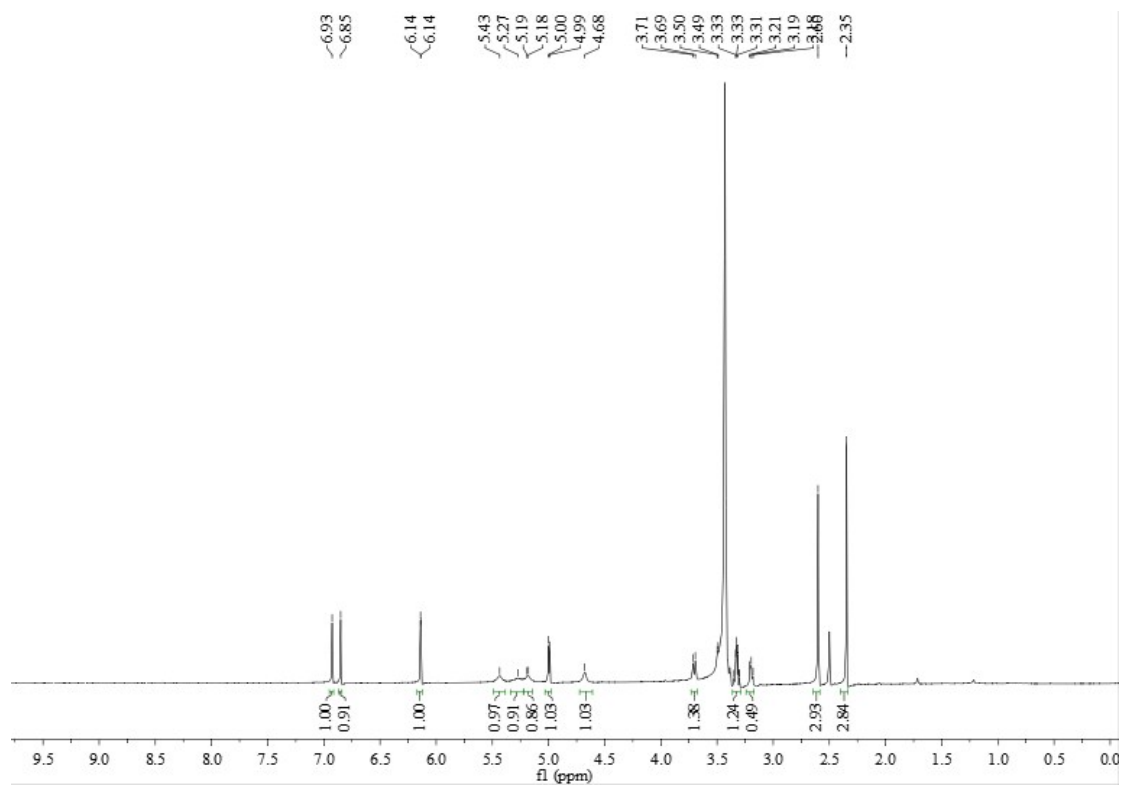

**Fig. S15.** <sup>1</sup>H NMR spectrum (500 MHz) of IV-1 in DMSO-d<sub>6</sub>.



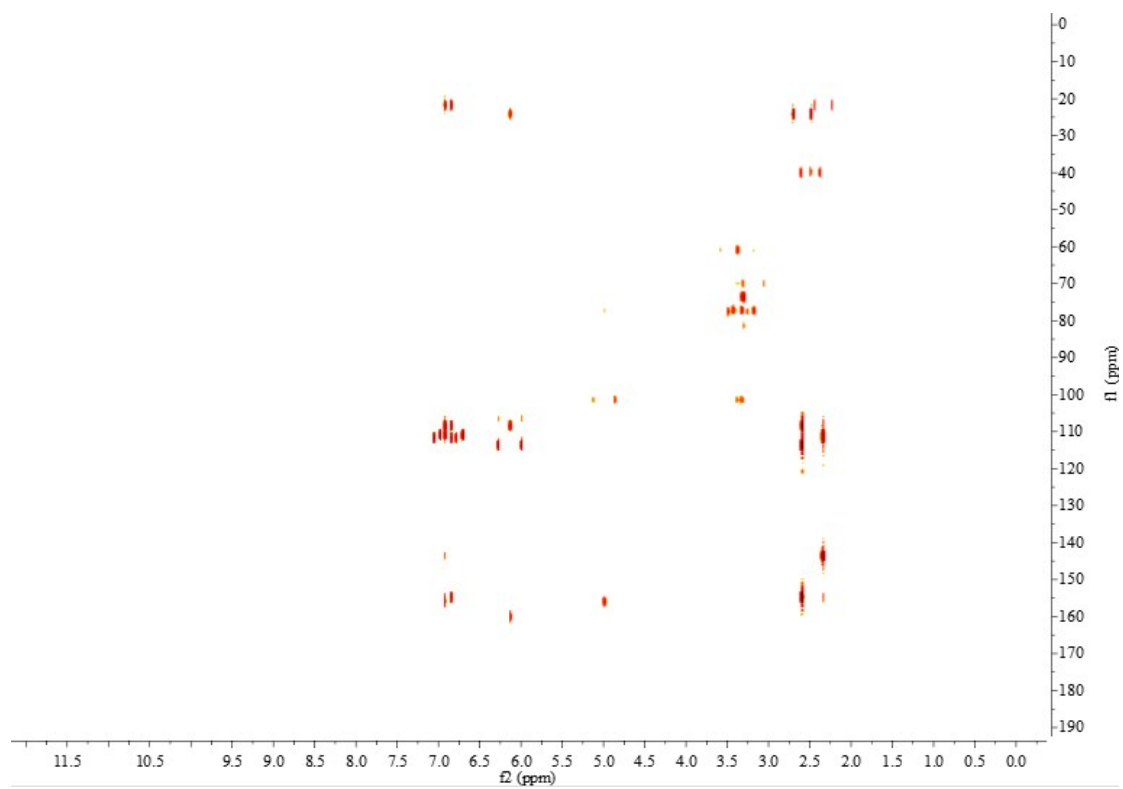

**Fig. S16.** HMBC spectrum of **IV-1** in DMSO-*d*<sub>6</sub>.

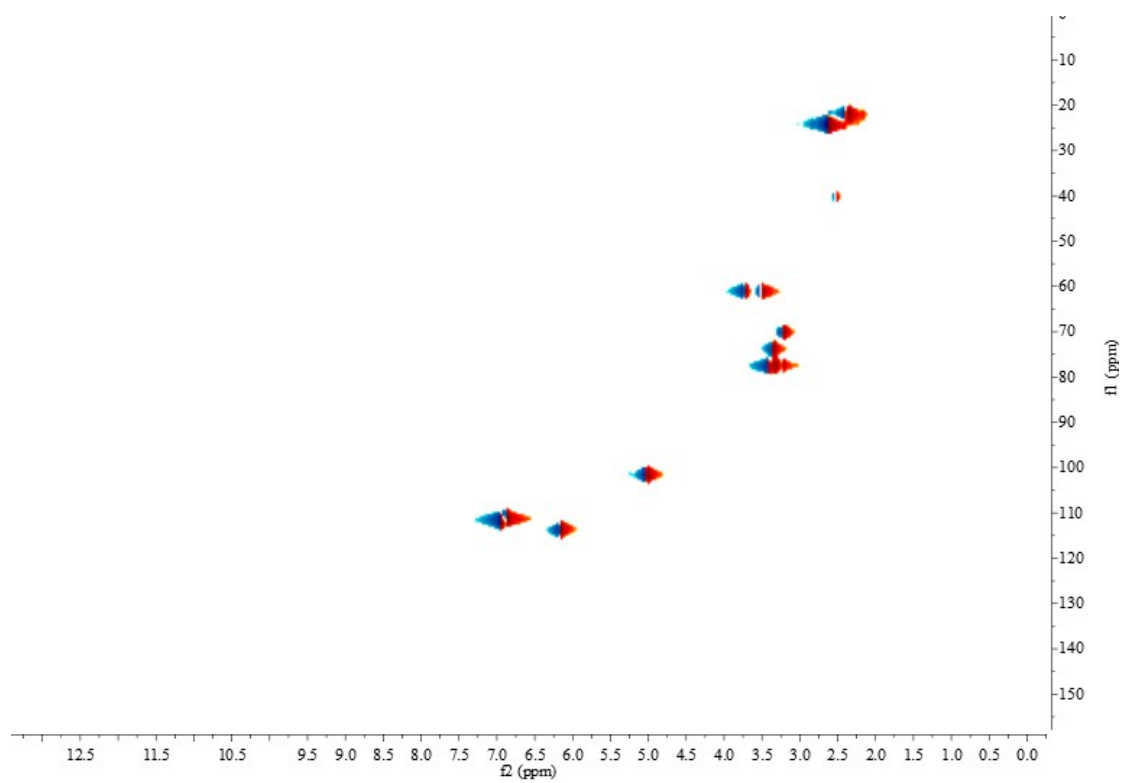

**Fig. S17.** HSQC spectrum of **IV-1** in DMSO-*d*<sub>6</sub>.

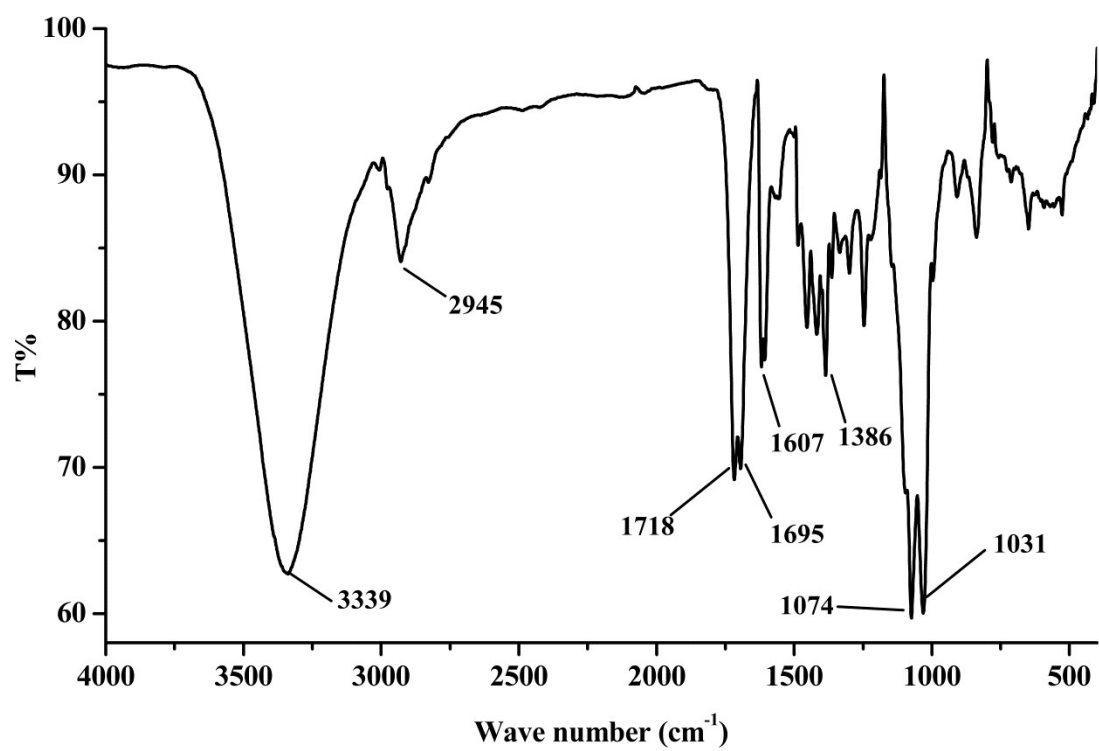

Fig. S18. IR spectrum of IV-1.
